# Supplementary material for: An extended wave of global mRNA deadenylation sets up a switch in translation regulation across the mammalian oocyte-to-embryo transition
Source: PubMed Central journal article supplement — Cell Rep. Author manuscript; Available in PMC 2024 Apr 22. (PMC11034814; doi:10.1016/j.celrep.2024.113710), 2024-02-01
Supplement: NIHMS1970869-supplement-1.pdf [file NIHMS1970869-supplement-1.pdf]

**Cell Reports, Volume 43**

**Supplemental information**

**An extended wave of global mRNA deadenylation  
sets up a switch in translation regulation  
across the mammalian oocyte-to-embryo transition**

**Katherine Lee, Kyu-cheol Cho, Robert Morey, and Heidi Cook-Andersen**

Cell Reports, Volume ■ ■

## **Supplemental information**

**An extended wave of global mRNA deadenylation  
sets up a switch in translation regulation  
across the mammalian oocyte-to-embryo transition**

**Katherine Lee, Kyucheol Cho, Robert Morey, and Heidi Cook-Andersen**

Supplementary Materials for

**An extended wave of global mRNA deadenylation sets up a switch in translation regulation across the mammalian oocyte-to-embryo transition**

Katherine Lee<sup>2</sup>, Kyucheol Cho<sup>1</sup>, Robert Morey<sup>3</sup>, and Heidi Cook-Andersen<sup>1,2,4</sup>

<sup>4</sup>Correspondence: Heidi Cook-Andersen (hcookandersen@health.ucsd.edu)

This PDF file includes:

Figs. S1 to S10

Other Supplementary Materials for this manuscript include the following:

Data S1 to S4:

Data S1\_Sequencing\_Tail\_Lengths\_TranscriptIDs\_Stability\_MEG.xlsx

Data S2\_GO\_Analyses.xlsx

Data S3\_Isoform\_Tail\_Length\_Regulation.xlsx

Data S4\_RBP\_3'UTR\_Motif\_Enrichment.xlsx

Figure S1

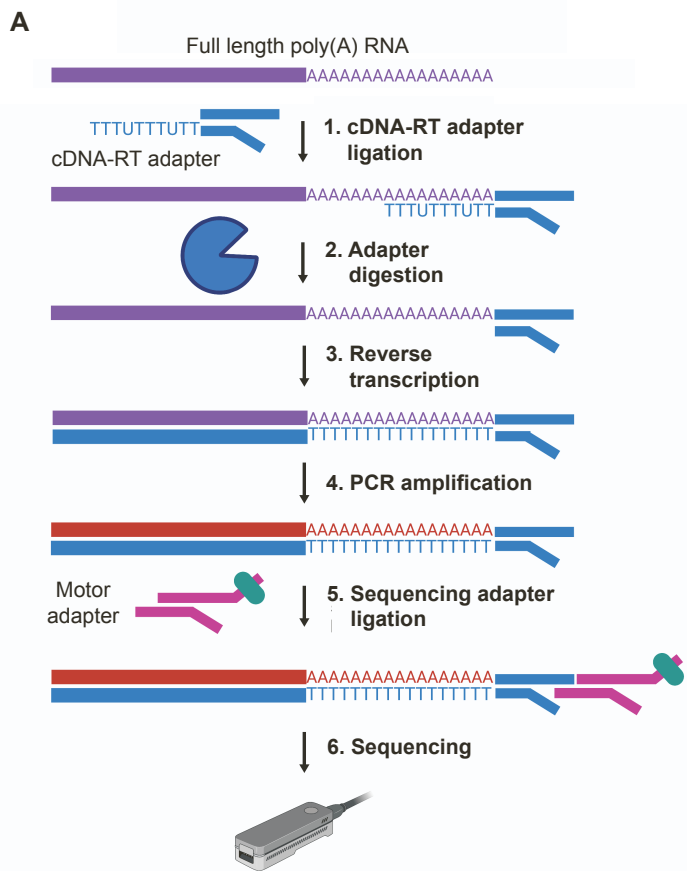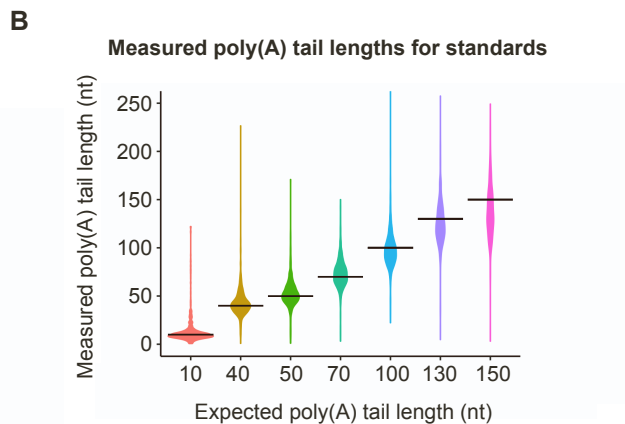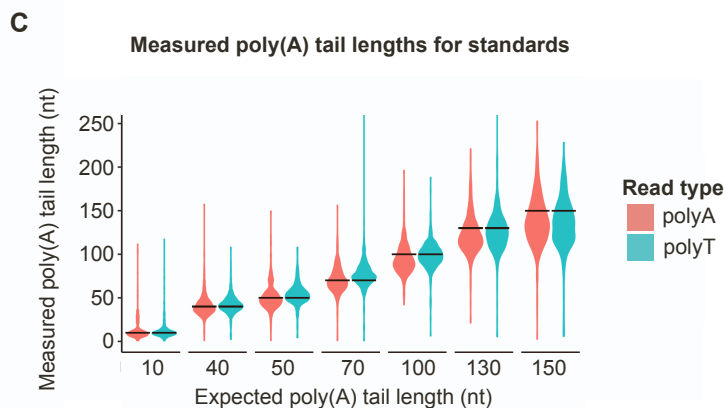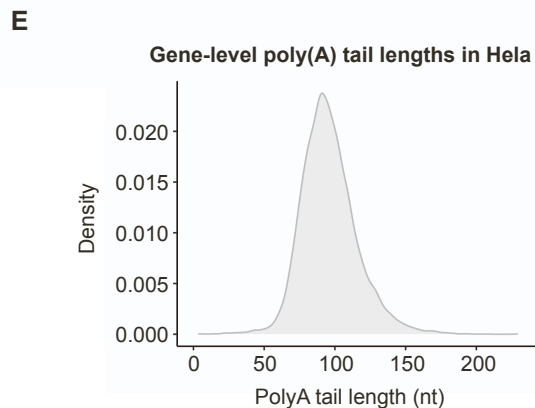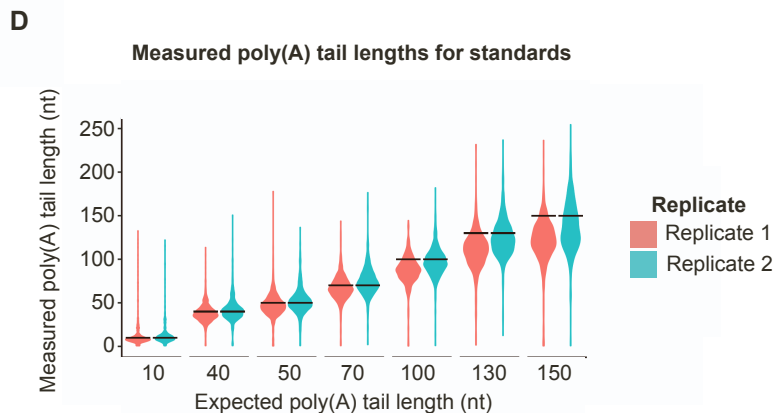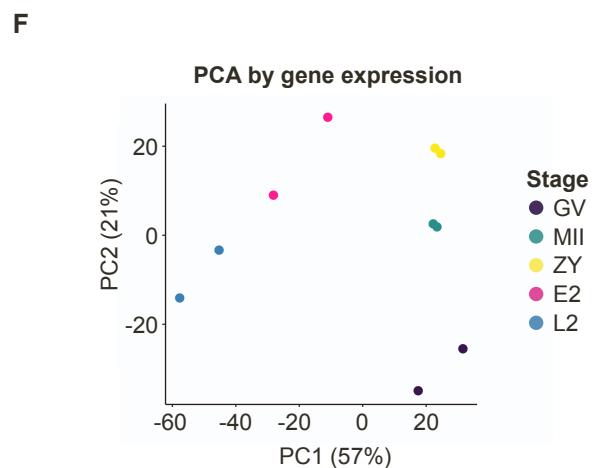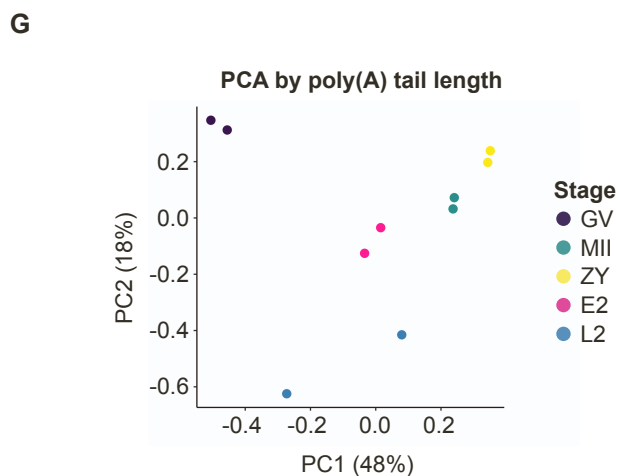

**Figure S1. Nanopore PCR-cDNA sequencing accurately and reproducibly measures poly(A) tail lengths, Related to Figure 1.** (A) Schematic of Nanopore PCR-cDNA sequencing. (B) Measured tail lengths for 7 standards of different poly(A) tail lengths. (C-D) Same as (B) but separated by read type (C) or replicate (D). For (B-D), horizontal lines indicate expected poly(A) tail lengths for each standard. (E) Global distribution of gene-level mean poly(A) tail lengths in HeLa. Only genes with  $\geq 10$  polyadenylated reads were included. (F) PCA clustering of developmental stages and biological replicates by gene expression. (G) PCA clustering of developmental stages and biological replicates by poly(A) tail length.

Figure S2

A

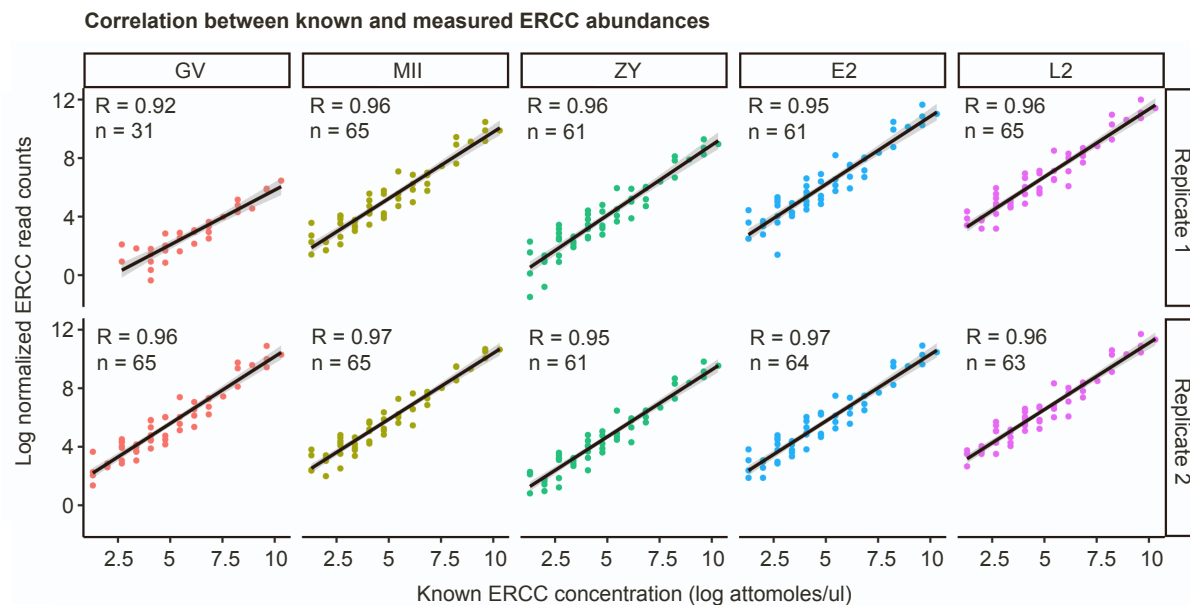

B

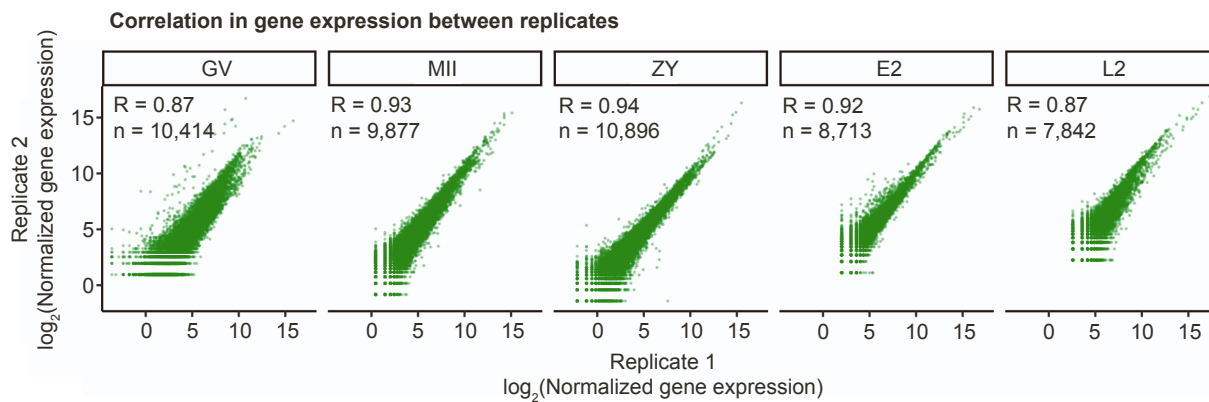

C

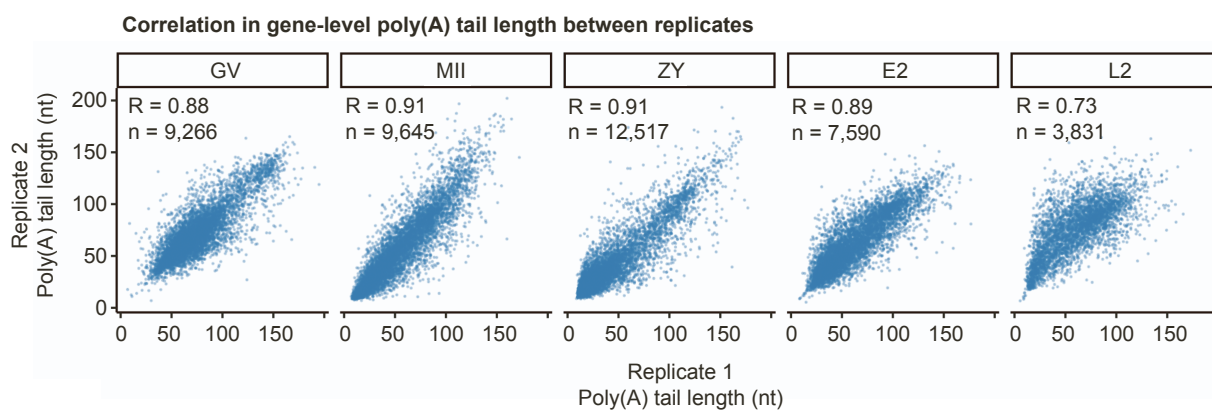

**Figure S2. Nanopore PCR-cDNA sequencing reproducibly captures poly(A) tail lengths and gene expression profiles across the OET, Related to Figure 1.** (A) Correlation between known and measured abundances for ERCC standards. (B) Correlation in gene expression between biological replicates. (C) Correlation in gene-level poly(A) tail length between biological replicates. Only genes with  $\geq 20$  polyadenylated reads in each replicate are plotted. R, Pearson correlation coefficient; n, number of genes or ERCC standards.

**Figure S3****A**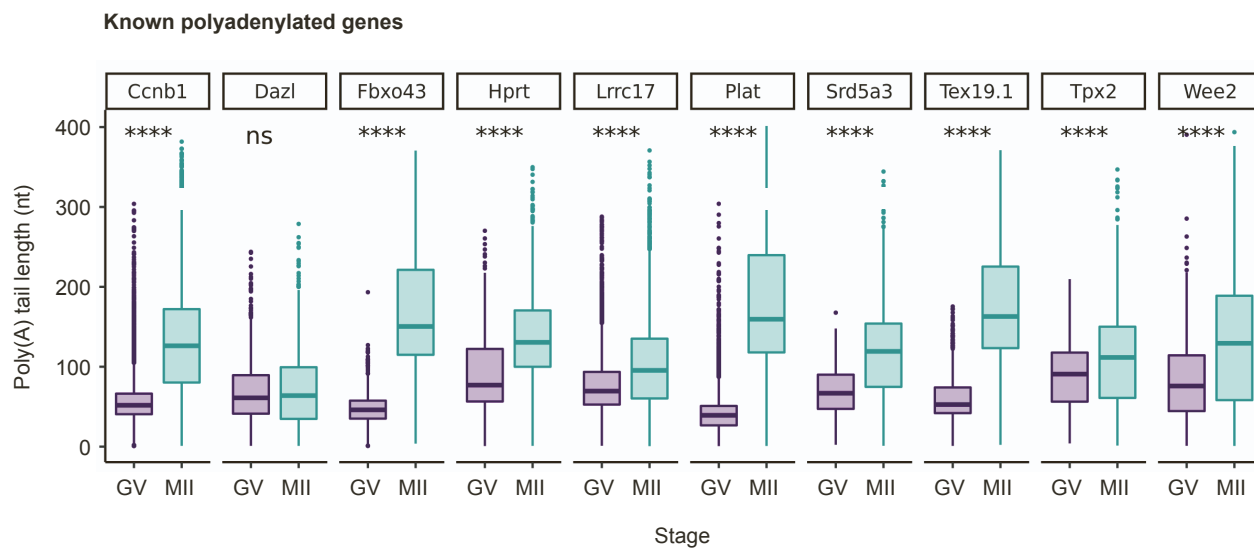**B**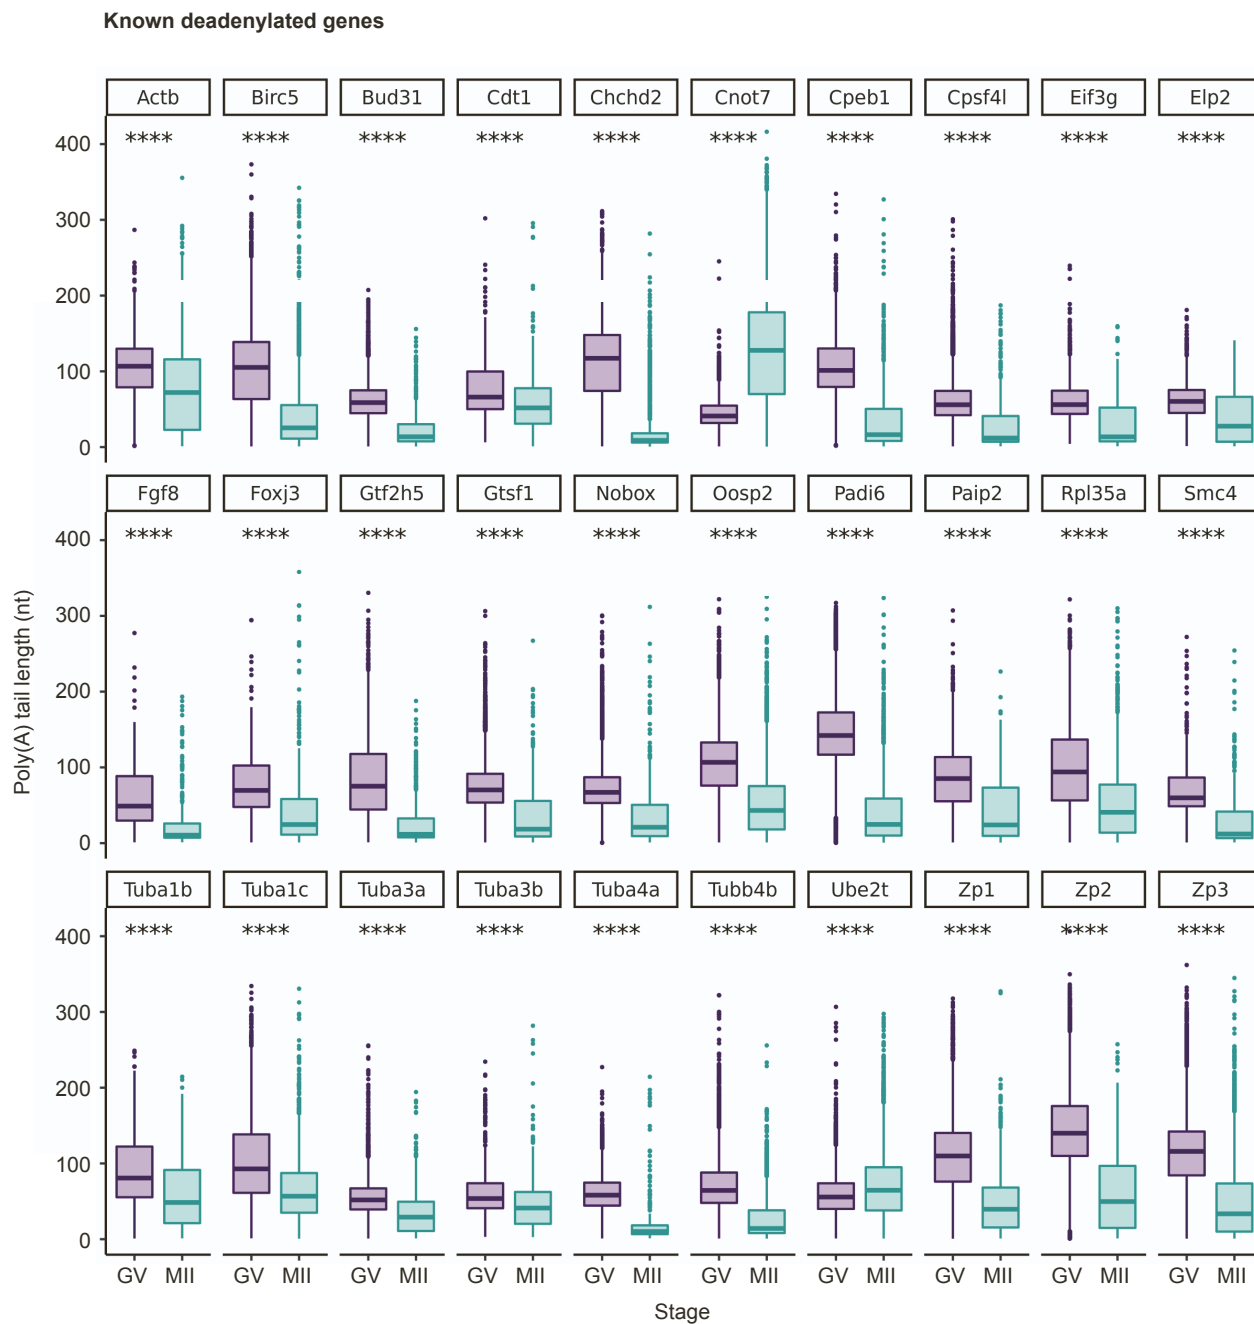



**Figure S3. Nanopore PCR-cDNA sequencing accurately captures known changes in poly(A) tail length for individual genes, Related to Figure 1.** (A-B) Measured poly(A) tail lengths in GV and MII oocytes for all identified genes previously shown to be polyadenylated (A) or deadenylated (B) during oocyte maturation using an orthogonal method [1-15]. One-sided Wilcoxon tests shown (\*\*\*  $p \leq 0.0001$ ). Two genes (Btg4 and Mos) were excluded for conflicting published tail length changes [3,7,16].

Figure S4

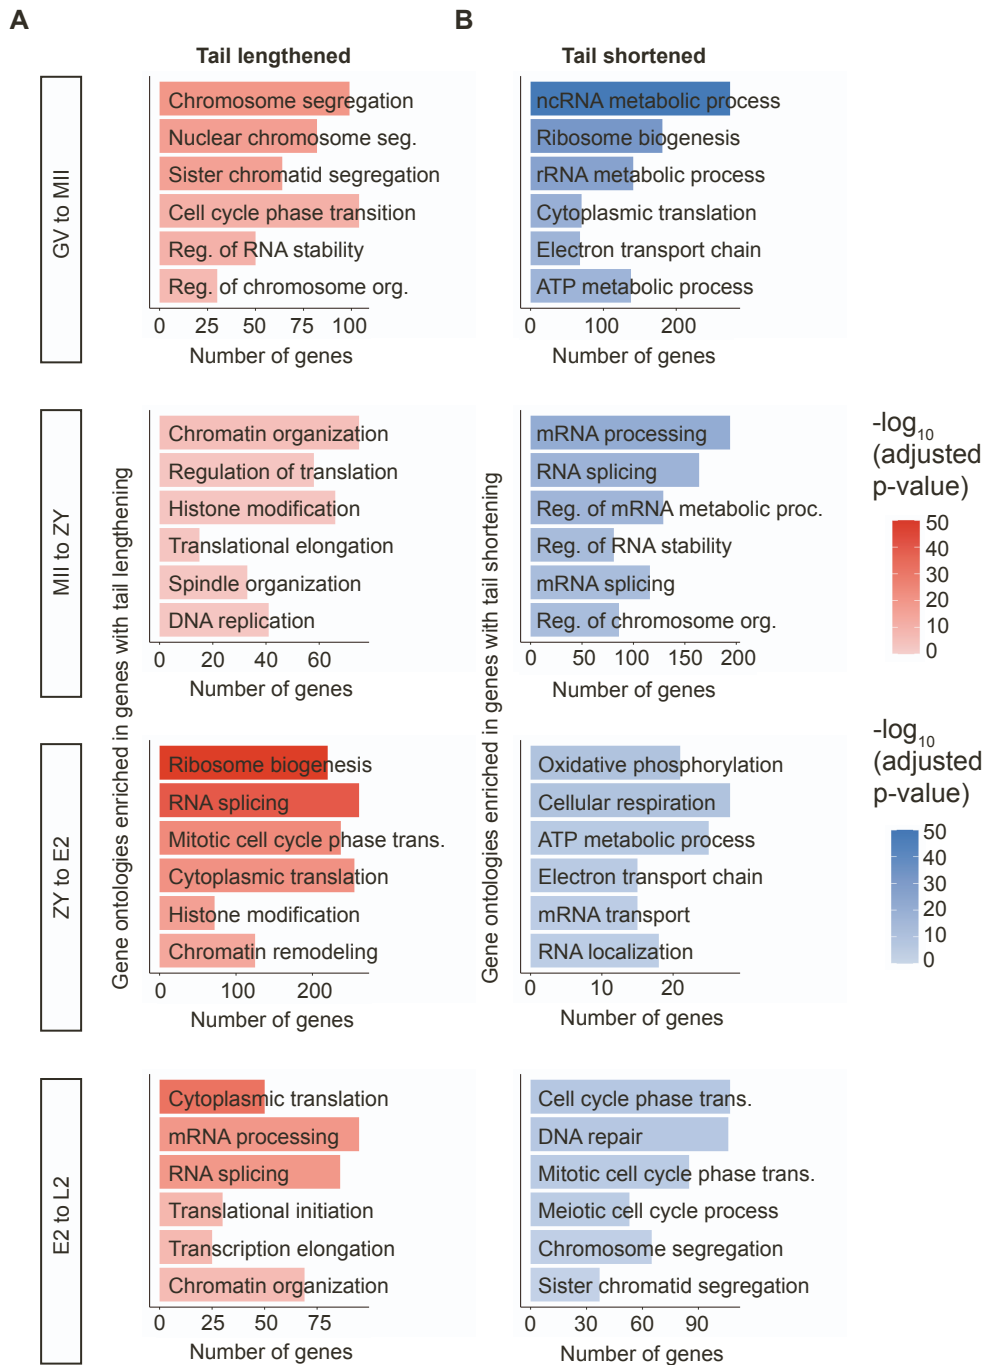

**Figure S4. Polyadenylated mRNAs at each stage are enriched for factors with stage-specific developmental roles, Related to Figure 1.** Gene ontologies enriched in genes with significantly lengthened (red) (A) and shortened (blue) (B) tail lengths at each stage transition.

**Figure S5**

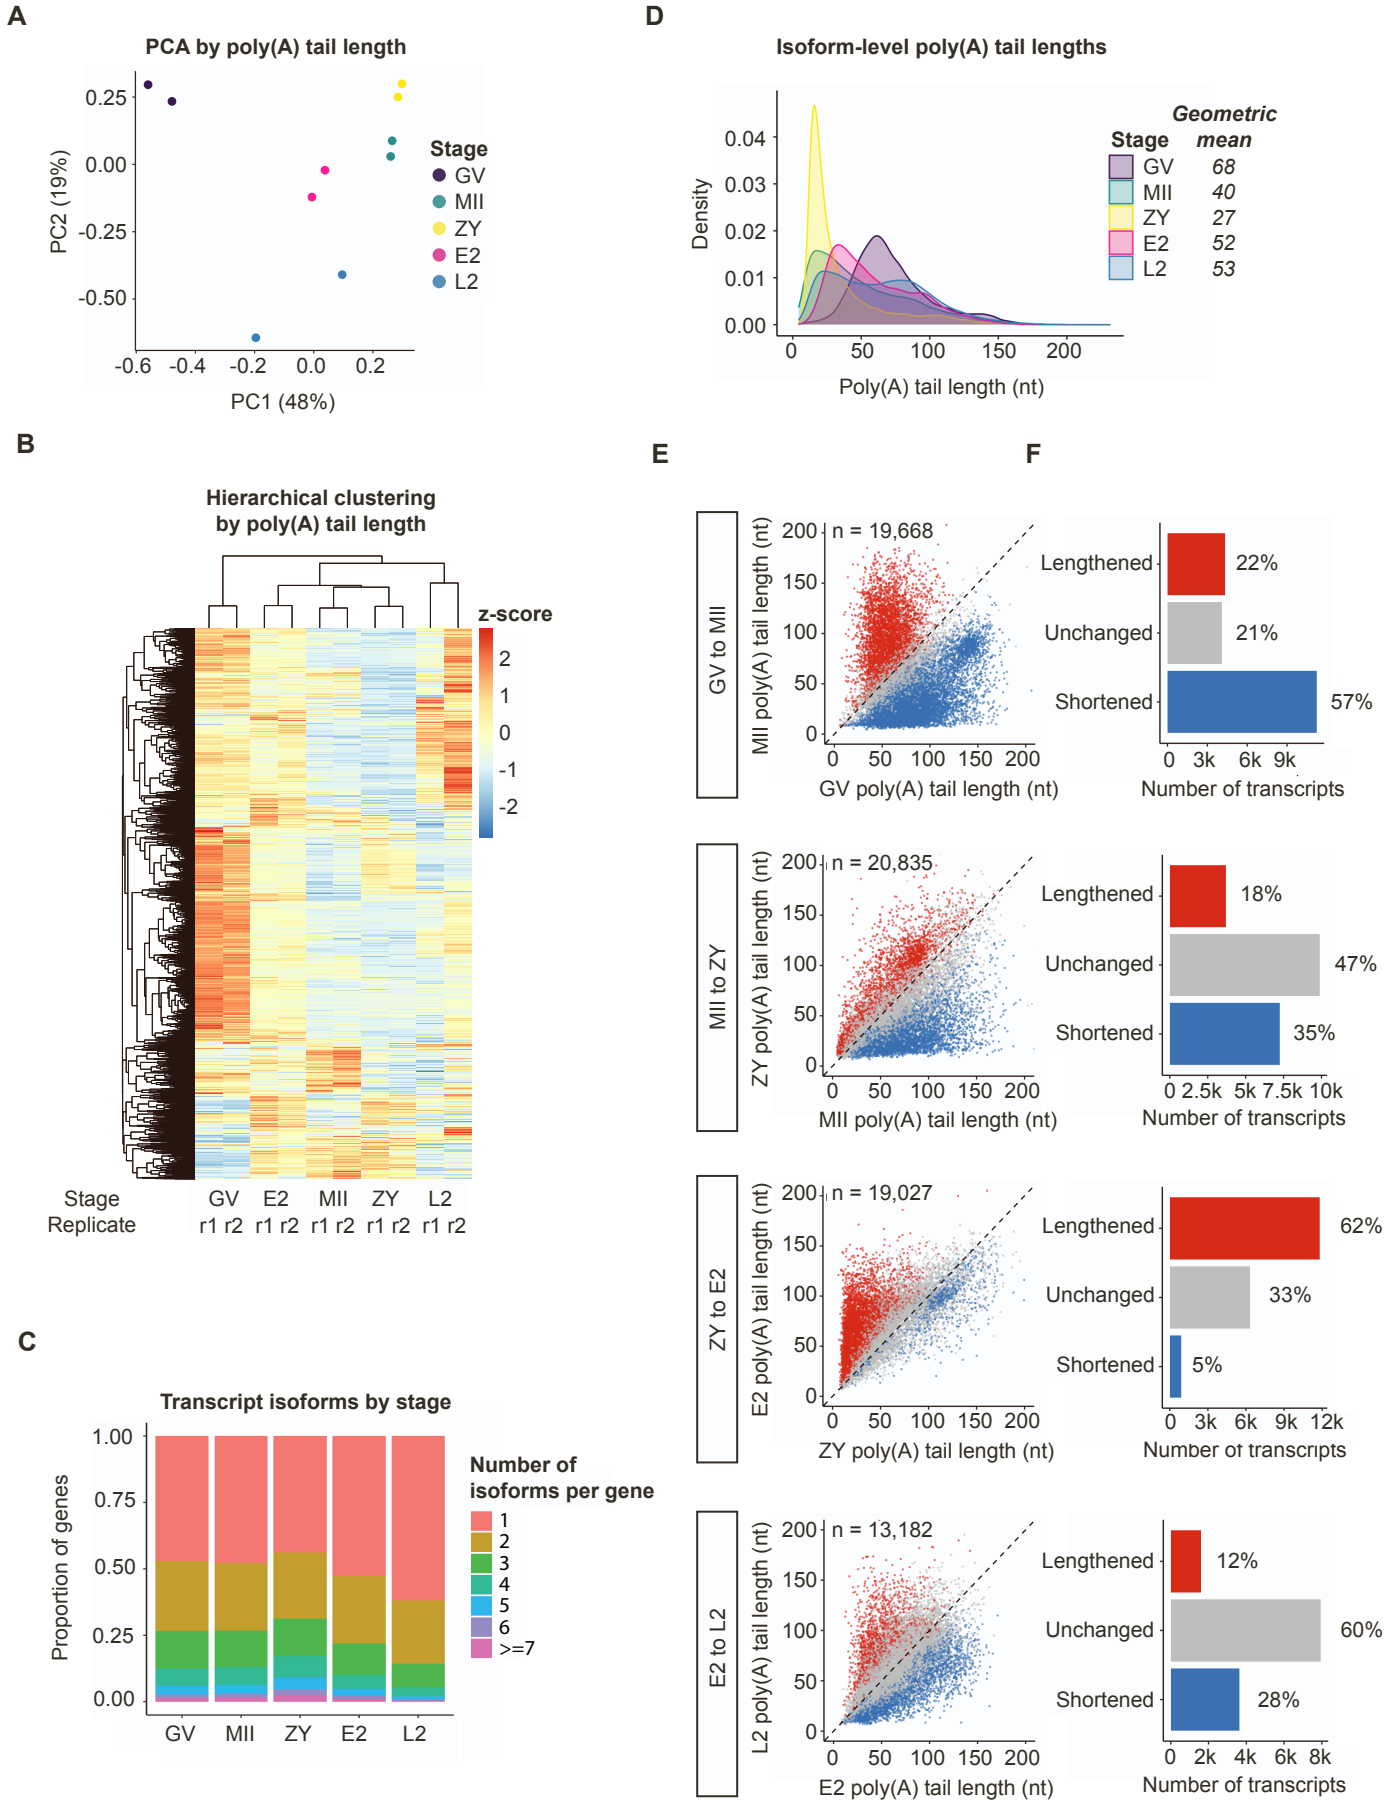

**Figure S5. mRNA poly(A) tails are dynamically regulated at the isoform-level, Related to Figure 2.** (A) PCA clustering of developmental stages and biological replicates by isoform-level poly(A) tail length. (B) Hierarchical clustering of stages and biological replicates by isoform-level poly(A) tail length. (C) Proportion of genes with different numbers of isoforms by stage. (D) Density plots showing global distributions of isoform-level mean poly(A) tail lengths at each stage. (E) Scatterplots showing mean poly(A) tail lengths for isoforms with significantly increased (lengthened, red), decreased (shortened, blue) or unchanged (gray) tail length at each stage transition (adj.  $p < 0.05$ , one-sided Wilcoxon test). (F) Number of genes in each category in (E).

**Figure S6****A**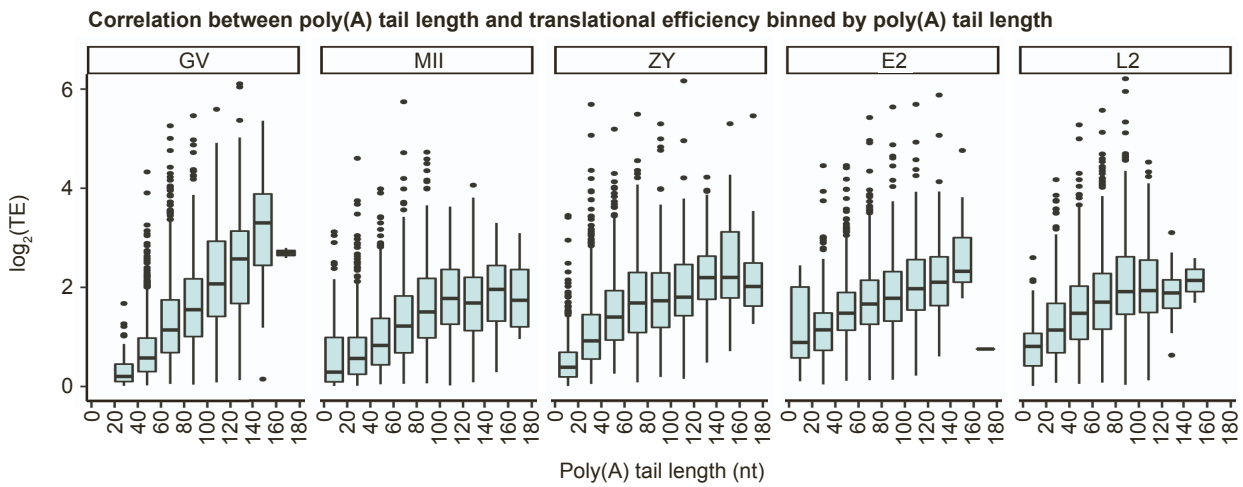**B**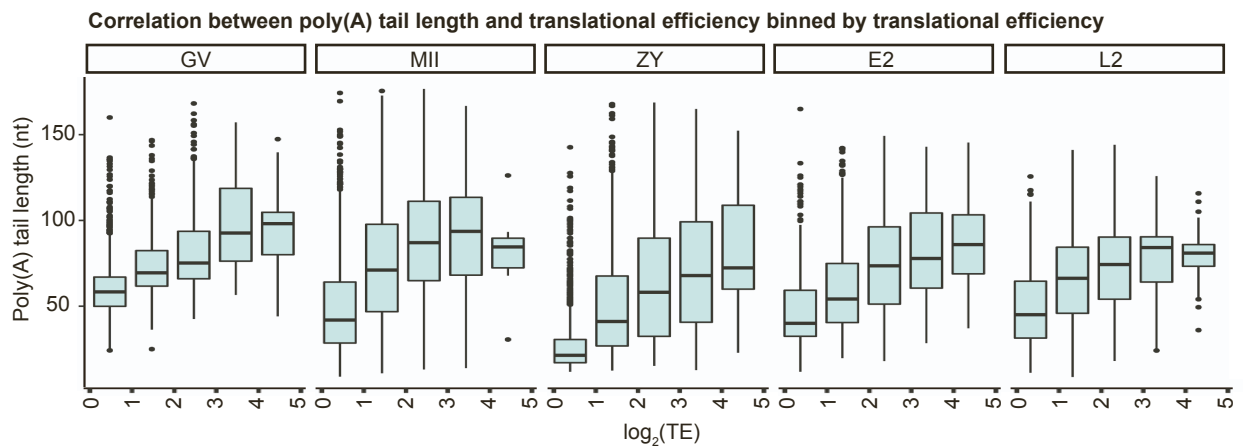**C**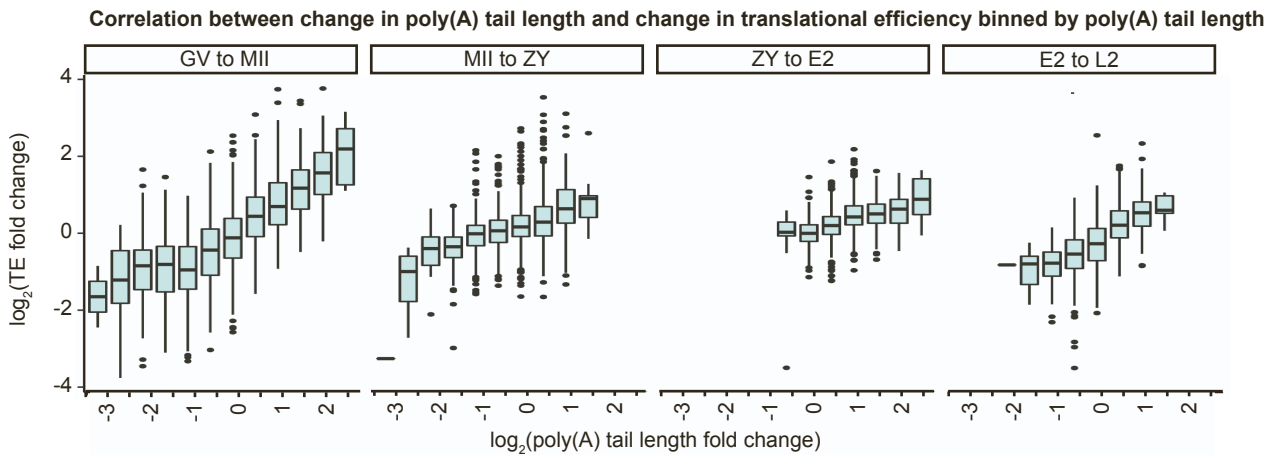**D**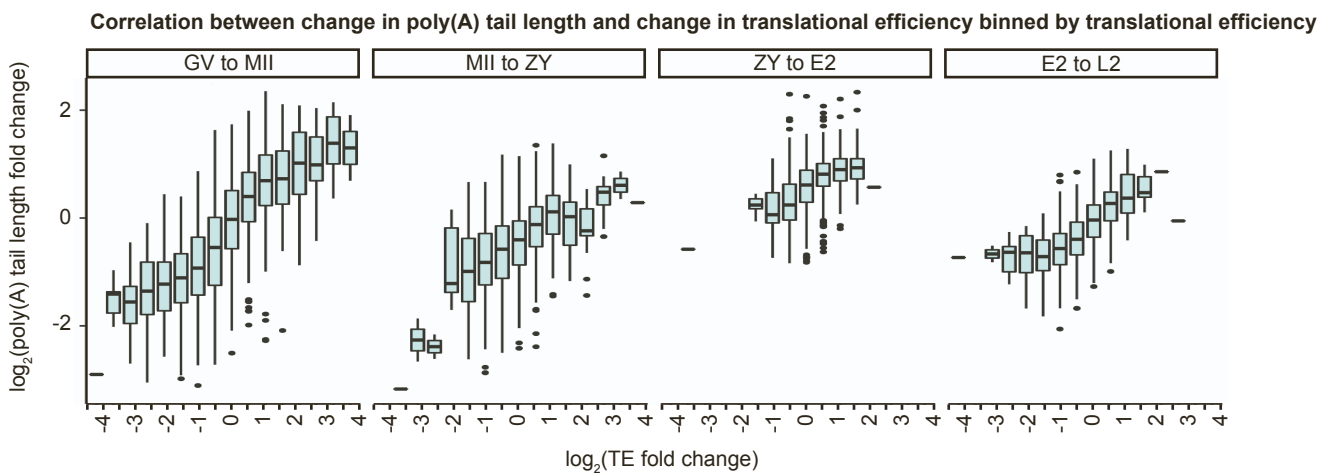

**Figure S6. Poly(A) tail length positively correlates with translational efficiency during OET, Related to Figure 4. (A)**

Translational efficiency of genes binned by poly(A) tail length at each stage. (B) Poly(A) length of genes binned by translational efficiency at each stage. (C) Change in translational efficiency of genes binned by change in poly(A) tail length between consecutive stages. (D) Change in poly(A) tail length of genes binned by change in translational efficiency between consecutive stages. TE, translational efficiency.

**Figure S7**

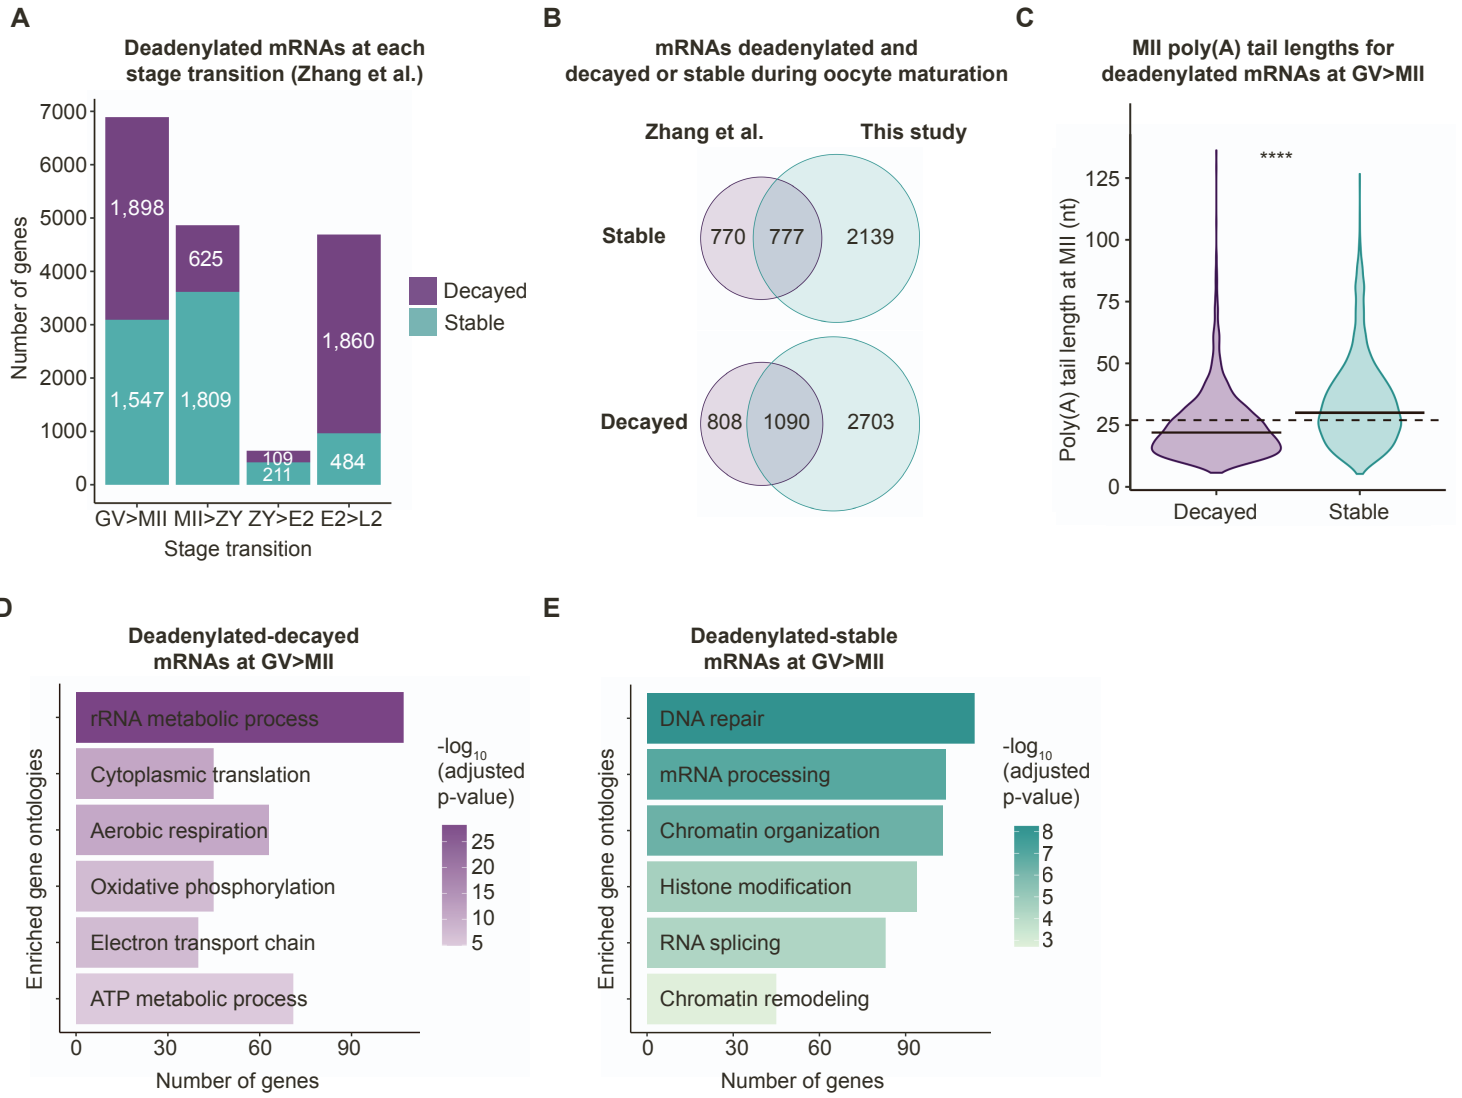



**Figure S7. Deadenylated maternal mRNAs coupled and uncoupled from mRNA decay, Related to Figure 5.** (A) Number of deadenylated-decayed (purple) or -stable (teal) genes at each stage transition using RNA abundances measured in Zhang et al. [17] integrated with poly(A) tail lengths measured in this dataset. (B) Venn diagrams demonstrating overlap of these genes with those identified using RNA abundances and poly(A) tail lengths measured in this study. (C) Poly(A) tail lengths at the MII stage of genes deadenylated-decayed (purple) or -stable (teal) during oocyte maturation. Solid horizontal lines indicate geometric means. Dashed horizontal line at indicates predicted PABP footprint of 27 nucleotides. Two-sided Wilcoxon test shown ( $^{***}p \leq 0.0001$ ). (D-E) Gene ontologies enriched in genes deadenylated-decayed (D) or -stable (E) during oocyte maturation.

**Figure S8**

**A**

**Polyadenylated-activated genes**

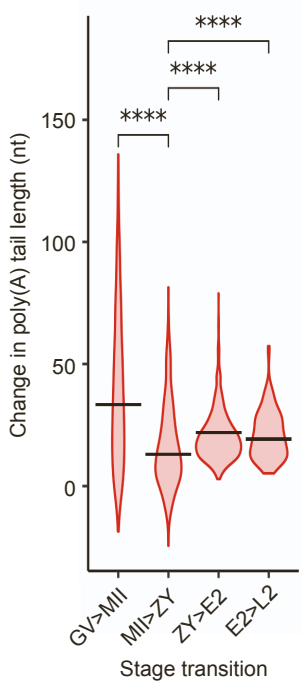

**B**

**GV>MII deadenylated-activated genes**

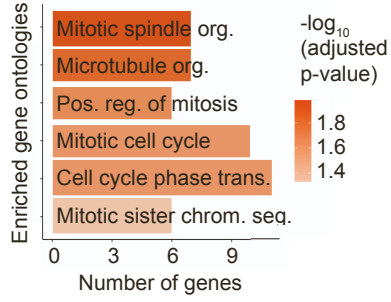

**MI I>ZY deadenylated-activated genes**

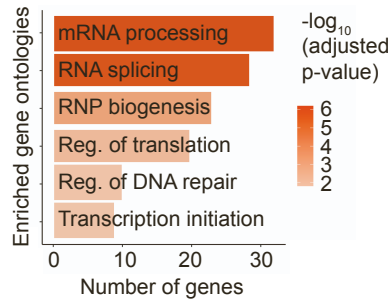

**C**

**GV>MII deadenylated-repressed genes**

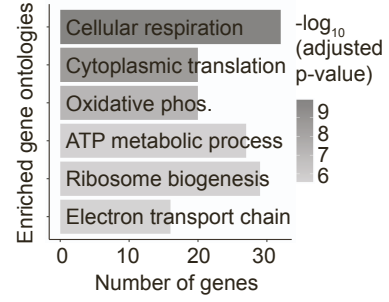

**MI I>ZY deadenylated-repressed genes**

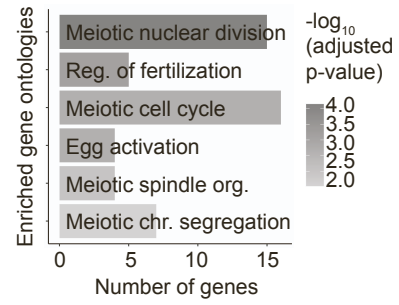

**Figure S8. Genes translationally activated by resistance to global deadenylation play developmentally important roles, Related to Figure 6.** (A) Change in poly(A) tail length for polyadenylated genes with increased translational efficiency at each stage transition. Horizontal lines indicate arithmetic means. Pairwise two-sided Wilcoxon tests shown for all stage transitions compared to MII>ZY (\*\*\*)  $p \leq 0.0001$ ). (B) Gene ontologies enriched in genes deadenylated-activated during oocyte maturation (GV>MII, top) or fertilization (MII>ZY, bottom). (C) Gene ontologies enriched in genes deadenylated-repressed during oocyte maturation (GV>MII, top) or fertilization (MII>ZY, bottom).

**Figure S9**

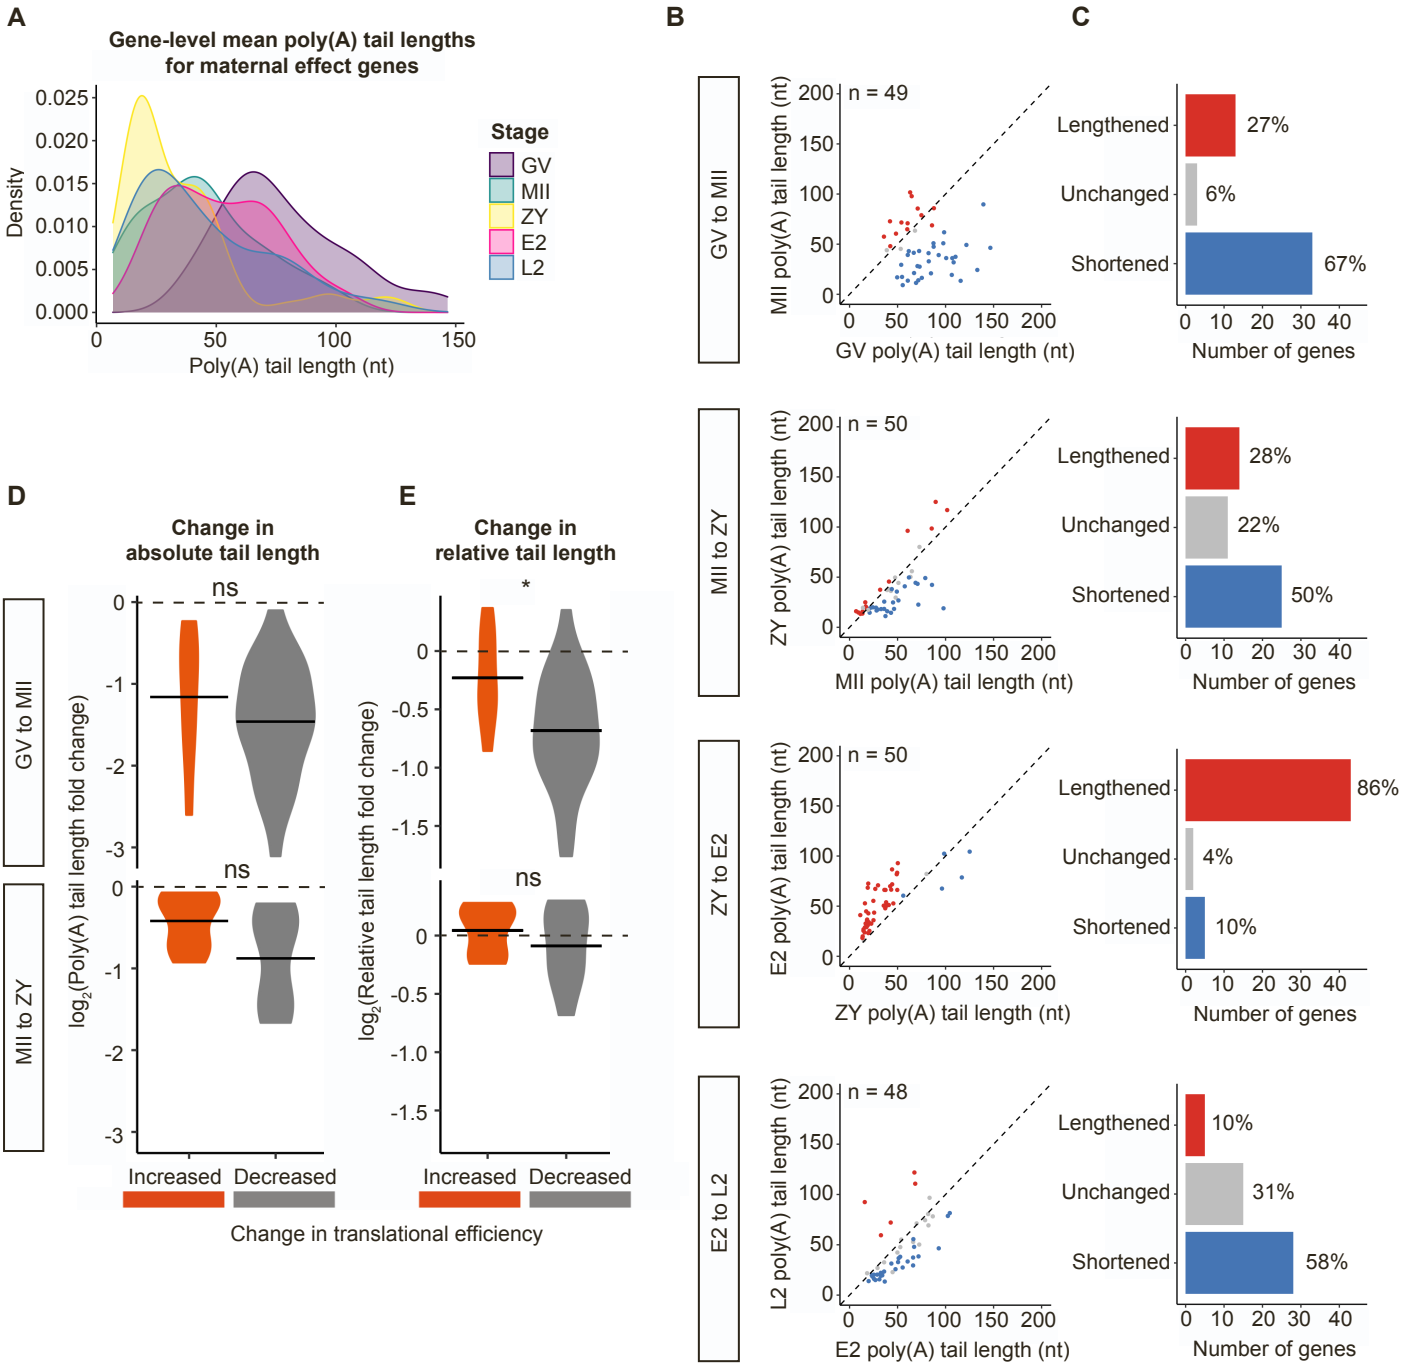

**Figure S9. Dynamic regulation of poly(A) tail length of maternal effect genes (MEGs), Related to Figure 7.** (A) Density plots showing global distributions of gene-level mean poly(A) tail lengths at each stage for MEGs. (B) Scatterplots showing mean poly(A) tail lengths for MEGs with significantly increased (lengthened, red), decreased (shortened, blue) or unchanged (gray) tail lengths at each stage transition (adj.  $p < 0.05$ , one-sided Wilcoxon test). (C) Number of genes in each category in (B). (D-E)  $\text{Log}_2$  fold change in absolute (D) or relative (E) tail length for deadenylated-activated (orange) or -repressed (gray) MEGs across each stage transition. Horizontal lines indicate arithmetic means. To include genes translationally activated or repressed despite no significant change in tail length, the adjusted  $p$  value cutoff for classifying genes as deadenylated was removed. Two-sided Wilcoxon tests are shown (ns,  $p > 0.05$ ; \* $p \leq 0.05$ ).

**Figure S10**

**A**

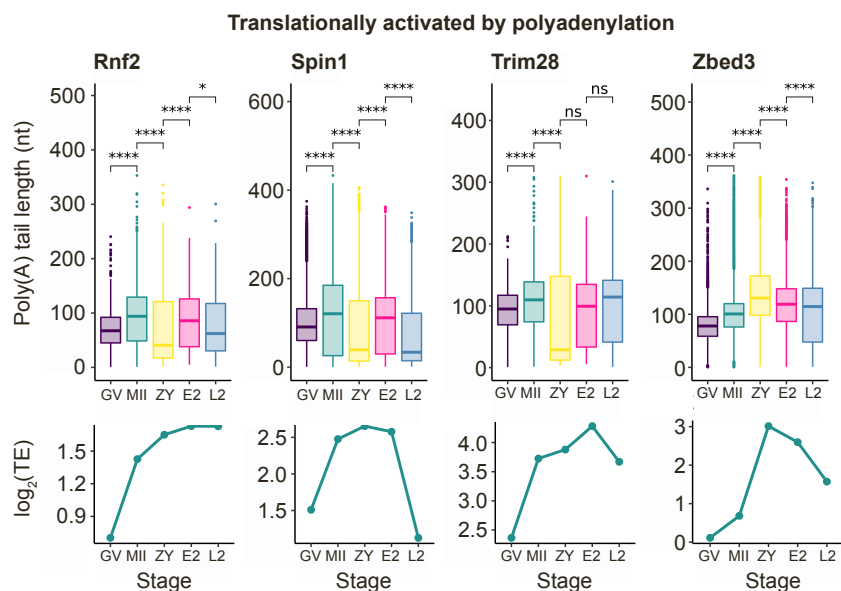

**B**

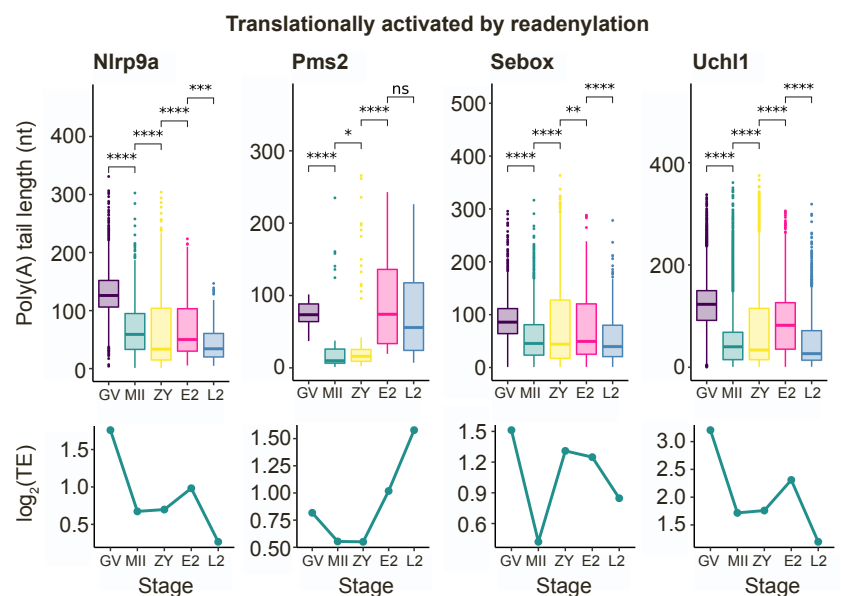

**C**

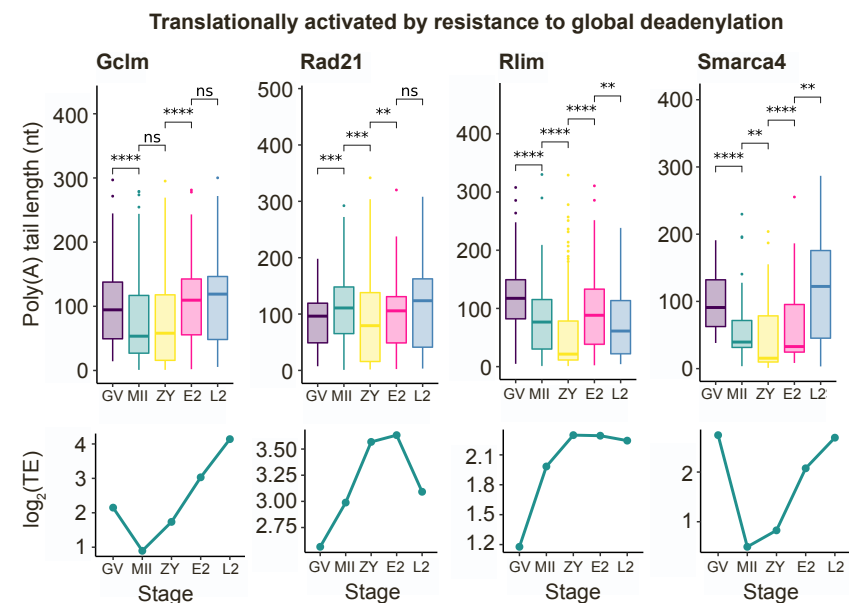

**D**

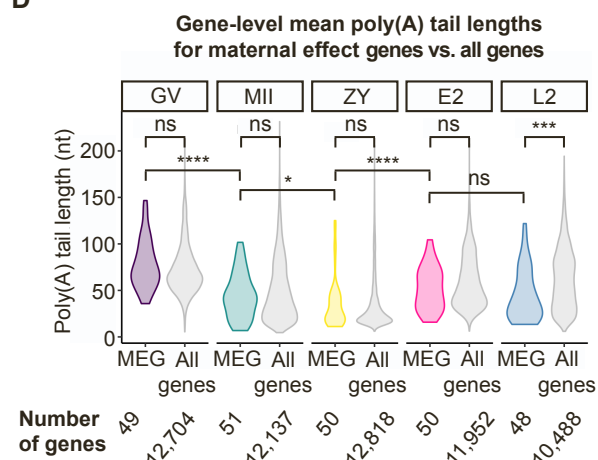

**E**

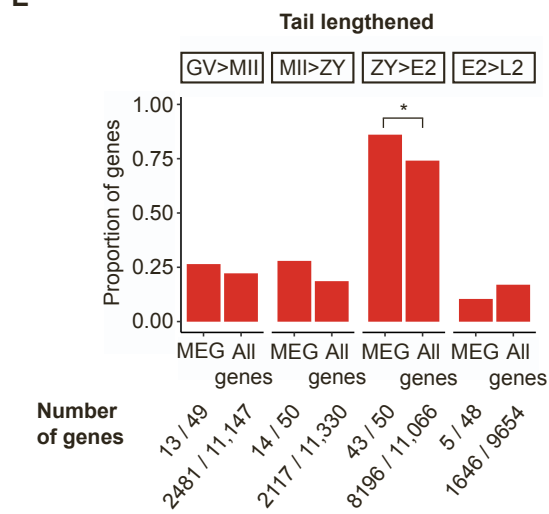

**F**

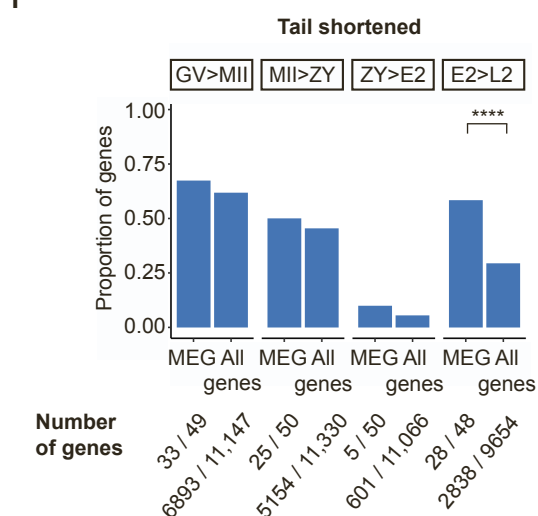

**Figure S10. Additional examples of poly(A) tail and TE regulation of maternal effect genes, Related to Figure 7.** (A-C) Poly(A) tail lengths (upper) and translational efficiencies (lower) of select maternal effect genes across the OET. Each box plot represents  $\geq 20$  polyadenylated reads. Pairwise two-sided Wilcoxon tests are shown (ns,  $p > 0.05$ ; \* $p \leq 0.05$ ; \*\* $p \leq 0.01$ ; \*\*\* $p \leq 0.001$ ; \*\*\*\* $p \leq 0.0001$ ). (D) Copy of Fig. 7C with the number of genes represented by each violin indicated at the bottom. Pairwise two-sided Wilcoxon tests are shown (ns,  $p > 0.05$ ; \* $p \leq 0.05$ ; \*\*\* $p \leq 0.001$ ; \*\*\*\* $p \leq 0.0001$ ). (E-F) Copy of Fig. 7D with the number of genes represented by each proportion indicated at the bottom. Pairwise one-sided Fisher's exact tests are shown (ns,  $p > 0.05$ ; \* $p \leq 0.05$ ; \*\*\* $p \leq 0.001$ ; \*\*\*\* $p \leq 0.0001$ ). TE, translational efficiency.

## References

1. Jiang, X., Cheng, Y., Zhu, Y., Xu, C., Li, Q., Xing, X., Li, W., Zou, J., Meng, L., Azhar, M., et al. (2023). Maternal NAT10 orchestrates oocyte meiotic cell-cycle progression and maturation in mice. *Nat Commun* 14. 10.1038/s41467-023-39256-0.
2. Liu, Y., Lu, X., Shi, J., Yu, X., Zhang, X., Zhu, K., Yi, Z., Duan, E., and Li, L. (2016). BTG4 is a key regulator for maternal mRNA clearance during mouse early embryogenesis. *Journal of Molecular Biology* 366 8, 366–368.
3. Yu, C., Ji, S.Y., Sha, Q.Q., Dang, Y., Zhou, J.J., Zhang, Y.L., Liu, Y., Wang, Z.W., Hu, B., Sun, Q.Y., et al. (2016). BTG4 is a meiotic cell cycle-coupled maternal-zygotic-transition licensing factor in oocytes. *Nat Struct Mol Biol* 23, 387–394. 10.1038/nsmb.3204.
4. Martins, J.P.S., Liu, X., Oke, A., Arora, R., Franciosi, F., Viville, S., Laird, D.J., Fung, J.C., and Conti, M. (2016). DAZL and CPEB1 regulate mRNA translation synergistically during oocyte maturation. *J Cell Sci*, jcs.179218.
5. Sha, Q.Q., Zhu, Y.Z., Li, S., Jiang, Y., Chen, L., Sun, X.H., Shen, L., Ou, X.H., and Fan, H.Y. (2020). Characterization of zygotic genome activation-dependent maternal mRNA clearance in mouse. *Nucleic Acids Res* 48, 879–894. 10.1093/nar/gkz1111.
6. Zhu, Y., Wu, W., Chen, S., Zhang, Z., Zhang, G., Li, J., and Jiang, M. (2022). *Mettl3* downregulation in germinal vesicle oocytes inhibits mRNA decay and the first polar body extrusion during maturation. *Biol Reprod* 107, 765–778. 10.1093/biolre/ioac112.
7. Rong, Y., Ji, S.Y., Zhu, Y.Z., Wu, Y.W., Shen, L., and Fan, H.Y. (2019). ZAR1 and ZAR2 are required for oocyte meiotic maturation by regulating the maternal transcriptome and mRNA translational activation. *Nucleic Acids Res* 47, 11387–11402. 10.1093/nar/gkz863.
8. Zhao, L., Zhu, Y., Chen, H., Wu, Y., Pi, S., Chen, L., Shen, L., and Fan, H. (2020). PABPN1L mediates cytoplasmic mRNA decay as a placeholder during the maternal-to-zygotic transition. *EMBO Rep* 21, 1–15. 10.15252/embr.201949956.
9. Luong, X.G., Daldello, E.M., Rajkovic, G., Yang, C.R., and Conti, M. (2020). Genome-wide analysis reveals a switch in the translational program upon oocyte meiotic resumption. *Nucleic Acids Res* 48, 3257–3276. 10.1093/nar/gkaa010.
10. Ma, J., Fukuda, Y., and Schultz, R.M. (2015). Mobilization of Dormant *Cnot7* mRNA Promotes Deadenylation of Maternal Transcripts During Mouse Oocyte Maturation. *Biol Reprod* 93, 48. 10.1095/biolreprod.115.130344.
11. Paynton, B. V., Rempel, R., and Bachvarova, R. (1988). Changes in state of adenylation and time course of degradation of maternal mRNAs during oocyte maturation and early embryonic development in the mouse. *Dev Biol* 129, 304–314. 10.1016/0012-1606(88)90377-6.
12. Chen, J., Melton, C., Suh, N., Oh, J.S.S., Horner, K., Xie, F., Sette, C., Belloch, R., and Conti, M. (2011). Genome-wide analysis of translation reveals a critical role for deleted in azoospermia-like (*Dazl*) at the oocyte-to-zygote transition. *Genes Dev* 25, 755–766. 10.1101/gad.2028911.
13. Takei, N., Sato, K., Takada, Y., Iyyappan, R., Susor, A., and Kotani, T. (2021). *Tdrd3* regulates the progression of meiosis II through translational control of *Emi2* mRNA in mouse oocytes. *Physiology and Genetics*, 2021.02.17.431574. 10.1101/2021.02.17.431574.
14. Tay, J., Hodgman, R., and Richter, J.D. (2000). The Control of Cyclin B1 mRNA Translation during Mouse Oocyte Maturation. *Dev Biol* 221, 1–9.
15. Huarte, J., Belin, D., Vassalli, A., Strickland, S., and Vassalli, J.D. (1987). Meiotic maturation of mouse oocytes triggers the translation and polyadenylation of dormant tissue-type plasminogen activator mRNA. *Genes Dev* 1, 1201–1211. 10.1101/gad.1.10.1201.
16. Goldman D, Kiessling A, and Cooper G (1988). Post-transcriptional processing suggests that *c-mos* functions as a maternal message in mouse eggs. *Oncogene* 3, 159–162.
17. Zhang, B., Zheng, H., Huang, B., Li, W., Xiang, Y., Peng, X., Ming, J., Wu, X., and Zhang, Y. (2016). Allelic reprogramming of the histone modification H3K4me3 in early mammalian development. *Nature Publishing Group* 537, 553–557. 10.1038/nature19361.
